# Supplementary material for: Factors Determining Nestedness in Complex Networks
Source: PubMed Central journal article supplement (PMC3777946; doi:10.1371/journal.pone.0074025), 2013-09-19
Supplement: pone.0074025.s001.pdf [file pone.0074025.s001.pdf]

## Appendix S1: Nestedness index for bipartite networks

Mutualistic networks are usually bipartite: two sets of nodes exist such that all edges are between nodes in one set and those of another. The ones considered in Ref. [1], for instance, are composed of animals and plants which interact in symbiotic relations of feeding-pollination; these interactions only take place between animals and plants. Let us therefore consider a bipartite network and call the sets  $\Gamma_1$  and  $\Gamma_2$ , with  $n_1$  and  $n_2$  nodes, respectively ( $n_1 + n_2 = N$ ). Using the notation  $\langle \cdot \rangle_i$  for averages over set  $\Gamma_i$ , the total number of edges is  $\langle k \rangle_1 n_2 = \langle k \rangle_2 n_1 = \frac{1}{2} \langle k \rangle N$ . Assuming that the network is defined by the configuration ensemble, though with the additional constraint of being bipartite, the probability of node  $l$  being connected to node  $i$  is

$$\hat{\epsilon}_{il} = 2 \frac{k_i k_l}{\langle k \rangle N}$$

if they belong to different sets, and zero if they are in the same one. Proceeding as before, we find that the expected value of the nestedness for a bipartite network is

$$\eta_{bip} = \frac{1}{N^2} \left[ \sum_{i,j \in \Gamma_1} \frac{1}{k_i k_j} \sum_{l \in \Gamma_2} \frac{k_i k_l}{\langle k \rangle_1 n_2} \frac{k_l k_j}{\langle k \rangle_2 n_1} + \sum_{i,j \in \Gamma_2} \frac{1}{k_i k_j} \sum_{l \in \Gamma_1} \frac{k_i k_l}{\langle k \rangle_1 n_2} \frac{k_l k_j}{\langle k \rangle_2 n_1} \right] = \frac{n_1 \langle k^2 \rangle_2 + n_2 \langle k^2 \rangle_1}{\langle k \rangle_1 \langle k \rangle_2 (n_1 + n_2)^2}. \quad (1)$$

Interestingly, if  $n_1 = n_2$ , the fact that the network is bipartite has no effect on the nestedness:  $\eta_{bip} = \eta_{conf}$ .

## References

1. Bastolla U, Fortuna M, Pascual-García A, Ferrera A, Luque B, et al. (2009) The architecture of mutualistic networks minimizes competition and increases biodiversity. *Nature* 458: 1018-21.
