# Supplementary material for: Factors Determining Nestedness in Complex Networks
Source: PubMed Central journal article supplement (PMC3777946; doi:10.1371/journal.pone.0074025), 2013-09-19
Supplement: pone.0074025.s002.pdf [file pone.0074025.s002.pdf]

## Appendix S2: Finite Size Scaling of Pearson's coefficient in scale-free networks

As show in Fig.2, finite-size networks built with the configuration model have a non-vanishing value of Pearson's coefficient,  $r$ . Given the fact that these networks are constructed without assuming any type of correlations, this is necessarily a finite-size effect. Let us compute  $r$  explicitly in finite-size scale-free networks, with  $P(k) \propto k^{-\gamma}$  with  $2 < \gamma < 3$ . The maximum expected degree,  $k$  in a network of size  $N$  is of the order  $N^{\frac{1}{\gamma-1}}$  and this cut-off controls the scaling of moments  $\langle k^m \rangle \sim \int_1^{K_{max}} k^m k^{-\gamma} dk \sim k^{m-\gamma+1} \Big|_1^{N^{\frac{1}{\gamma-1}}} \sim N^{\frac{m-\gamma+1}{\gamma-1}} - 1$ . Combining the expressions for the first three moments appearing in the definition of  $r$ , Eq.7, one readily obtains;

$$r = \frac{aN^{\frac{3-\gamma}{\gamma-1}} - bN^2 \frac{3-\gamma}{\gamma-1}}{cN^{\frac{4-\gamma}{\gamma-1}} - dN^2 \frac{3-\gamma}{\gamma-1}} \sim -eN^{\frac{2-\gamma}{\gamma-1}} \quad (1)$$

where  $a, b, c, d$ , and  $e$  are un-specified positive constants. For a scale-free network with  $\gamma = 2.5$  this reduces to  $r \sim N^{-\frac{1}{3}}$  in agreement with numerical results shown in Fig.2 (observe that, as we use a logarithmic scale, the absolute value of  $r$  rather than  $r$  itself is employed).
