# Supplementary material for: Factors Determining Nestedness in Complex Networks
Source: PubMed Central journal article supplement (PMC3777946; doi:10.1371/journal.pone.0074025), 2013-09-19
Supplement: pone.0074025.s005.pdf [file pone.0074025.s005.pdf]

## Appendix S5: Network Data

Unimodal networks on Fig 4

| Network                             | $r$    | r z-score  | r P-value | $\eta$ | $\eta$ z-score | $\eta$ P-value | $\eta$ z-score with correlations |
|-------------------------------------|--------|------------|-----------|--------|----------------|----------------|----------------------------------|
| <b>Biological - Food Webs (13)</b>  |        |            |           |        |                |                |                                  |
| Little Rock lake                    | -0.327 | 0.514 ()   | 0.300 ()  | 1.326  | 0.026 ()       | 0.199 ()       | 0.350 ()                         |
| Ythan Estuary                       | -0.278 | 2.000 ()   | 0.039 (*) | 1.482  | -2.459 ()      | 0.021 (*)      | -1.339 ()                        |
| Stony Stream                        | -0.208 | 0.368 ()   | 0.401 ()  | 1.295  | -0.500 ()      | 0.300 ()       | -0.594 ()                        |
| Canton creek                        | -0.201 | 0.667 ()   | 0.266 ()  | 1.331  | -1.454 ()      | 0.096 ()       | -0.880 ()                        |
| Skipwith Pond                       | -0.086 | -3.406 (*) | 0.001 (*) | 1.014  | 2.142 ()       | 0.017 (*)      | -4.600 (*)                       |
| El Verde rainforest                 | -0.171 | 0.133 ()   | 0.306 ()  | 1.187  | 1.520 ()       | 0.072 ()       | 0.561 ()                         |
| Caribbean Reef                      | -0.164 | -0.778 ()  | 0.245 ()  | 1.095  | -0.687 ()      | 0.297 ()       | -3.140 (*)                       |
| St. Martin Island                   | -0.135 | 0.723 ()   | 0.226 ()  | 1.181  | -3.000 ()      | 0.005 (*)      | -5.488 (*)                       |
| UK grassland                        | -0.182 | 1.093 ()   | 0.142 ()  | 1.266  | -1.412 ()      | 0.069 ()       | -0.985 ()                        |
| Chesapeake bay                      | -0.115 | -0.510 ()  | 0.299 ()  | 1.080  | 1.015 ()       | 0.162 ()       | 1.191 ()                         |
| Northwest Shelf                     | -0.082 | -5.125 (*) | 0.000 (*) | 1.024  | 5.000 (*)      | 0.001 (*)      | -0.495 ()                        |
| Coachella Valley                    | 0.050  | -4.548 (*) | 0.000 (*) | 0.990  | 4.272 (*)      | 0.000 (*)      | 0.031 ()                         |
| St. Marks Forest                    | 0.116  | -3.379 (*) | 0.000 (*) | 0.984  | 2.733 ()       | 0.002 (*)      | -0.205 ()                        |
| <b>Biological - other (4)</b>       |        |            |           |        |                |                |                                  |
| Macaque cortex [1]                  | -0.295 | -3.167 (*) | 0.001 (*) | 1.664  | 0.076 ()       | 0.484 ()       | -2.909 ()                        |
| C.elegans metabolic network [2]     | -0.220 | 4.434 (*)  | 0.001 (*) | 1.736  | -1.500 ()      | 0.166 ()       | 0.5 ()                           |
| C.elegans neuronal connectivity [3] | -0.163 | 7.443 (*)  | 0.000 (*) | 1.908  | -12.446 (*)    | 0.000 (*)      | -3.875 (*)                       |
| Yeast metabolic [4]                 | -0.076 | -          | -         | 1.411  | -              | -              | -                                |
| <b>Social (12)</b>                  |        |            |           |        |                |                |                                  |
| Facebook friendship [5]             | -0.712 | -          | -         | 4.077  | -              | -              | -                                |
| Karate club [6]                     | -0.476 | 3.744 (*)  | 0.000 (*) | 1.568  | -3.487 (*)     | 0.000 (*)      | -0.303 ()                        |
| Kaitiaki web relations [7]          | -0.245 | 1.698 (*)  | 0.042 (*) | 0.203  | -0.904 ()      | 0.165 ()       | 0.287 ()                         |
| Political blogs [8]                 | -0.221 | -          | -         | 1.549  | -              | -              | -                                |
| Ownership network [9]               | -0.181 | -          | -         | 2.315  | -              | -              | -                                |
| Consulting firm [10]                | -0.167 | -          | -         | 1.073  | -              | -              | -                                |
| Political books in th US [8]        | -0.128 | -0.622 ()  | 0.229 ()  | 1.103  | 0.800 ()       | 0.189 ()       | 0.919 ()                         |
| Dolphins relationships [11]         | -0.044 | 0.149 ()   | 0.460 ()  | 1.164  | -1.020 ()      | 0.157 ()       | -1.480 ()                        |
| Jazz musicians [12]                 | 0.020  | -7.000 (*) | 0.000 (*) | 0.997  | 4.631 (*)      | 0.000 (*)      | 1.631 ()                         |

|                        |        |            |           |       |          |           |            |
|------------------------|--------|------------|-----------|-------|----------|-----------|------------|
| Football games [13]    | 0.162  | -4.526 (*) | 0.000 (*) | 0.999 | 2.000 () | 0.002 (*) | -3.832 (*) |
| Net-science arXiv [14] | 0.462  | -          | -         | 0.653 | -        | -         | -          |
| Technical (3)          |        |            |           |       |          |           |            |
| Airports network [15]  | -0.221 | -          | -         | 2.352 | -        | -         | -          |
| Power grid [16]        | 0.003  | -          | -         | 1.198 | -        | -         | -          |
| World flights [17]     | 0.051  | -          | -         | 1.134 | -        | -         | -          |

**Table S 1.** Pearson’s correlation coefficient and nestedness  $\eta$  for different empirical (unimodal) networks from different backgrounds appearing in Fig.4 . The z-score and P-values are calculated with respect to the random null model, and the “z-score with correlations” with the null model constraint to keep to the actual value of the Pearson’s coefficient  $r$ . The asterisks \* stand for z-values larger than 3 (in absolute value) and P-values smaller than the threshold 0.05.

Empirical bipartite networks on Fig 4

| Network                                              | $r$    | $r$ z-score | $r$ P-value | $\eta$ | $\eta$ z-score | $\eta$ P-value | $\eta$ z-score with correlations |
|------------------------------------------------------|--------|-------------|-------------|--------|----------------|----------------|----------------------------------|
| Plant - Pollinator [28]                              |        |             |             |        |                |                |                                  |
| Andean scrub (1) (Chile) [18]                        | -0.239 | 2.448 ( )   | 0.009 ( *)  | 1.409  | -2.857 ( )     | 0.005 ( *)     | -1.067 ( )                       |
| Andean scrub (2) (Chile) [18]                        | -0.363 | 2.840 ( )   | 0.003 ( *)  | 1.208  | -3.246 ( *)    | 0.001 ( *)     | -1.595 ( )                       |
| Montane forest and grassland (USA) [19]              | -0.131 | -2.364 ( )  | 0.011 ( *)  | 1.218  | 1.067 ( )      | 0.131 ( )      | -0.442 ( )                       |
| High-altitude desert (Canary Islands) [20]           | -0.018 | 0.625 ( )   | 0.253 ( )   | 0.989  | -0.340 ( )     | 0.334 ( )      | 0.397 ( )                        |
| Arctic community (Canada) [21]                       | -0.128 | 1.467 ( )   | 0.079 ( )   | 1.246  | -1.164 ( )     | 0.116 ( )      | 0.195 ( )                        |
| Multiple Communities (Galápagos Islands) [22]        | -0.638 | 5.444 ( *)  | 0.000 ( *)  | 2.416  | -5.033 ( *)    | 0.003 ( *)     | -1.957 ( )                       |
| Xeric scrub (Argentina) [23]                         | -0.241 | 4.086 ( *)  | 0.000 ( *)  | 1.447  | -4.104 ( *)    | 0.000 ( *)     | -0.919 ( )                       |
| Woody riverine veg. and xeric scrub (Argentina) [23] | -0.124 | 0.722 ( )   | 0.224 ( )   | 1.268  | -1.550 ( )     | 0.071 ( )      | -1.745 ( )                       |
| Palm swamp community (Venezuela) [24]                | -0.074 | 0.018 ( )   | 0.492 ( )   | 0.872  | 0.370 ( )      | 0.382 ( )      | 1.033 ( )                        |
| Boreal forest (Canada) [25]                          | -0.069 | 1.815 ( )   | 0.030 ( *)  | 1.309  | -0.926 ( )     | 0.138 ( )      | -0.151 ( )                       |
| Alpine subarctic community (sweden) [26]             | -0.034 | 0.500 ( )   | 0.298 ( )   | 1.061  | -0.500 ( )     | 0.282 ( )      | -0.625 ( )                       |
| High Arctic (Canada) [27]                            | -0.075 | 0.875 ( )   | 0.171 ( )   | 1.322  | -2.866 ( )     | 0.030 ( *)     | -2.977 ( )                       |
| Medow (U.K) [28]                                     | -0.104 | 0.049 ( )   | 0.434 ( )   | 1.442  | -1.049 ( )     | 0.156 ( )      | -0.658 ( )                       |
| Arctic community (Canada) [29]                       | -0.104 | -1.720 ( )  | 0.031 ( *)  | 0.821  | 1.472 ( )      | 0.069 ( )      | -0.485 ( )                       |
| Deciduous forest (USA) [30]                          | -0.040 | -0.571 ( )  | 0.307 ( )   | 1.130  | 0.544 ( )      | 0.297 ( )      | 0.130 ( )                        |
| Coastal forest (Mauritius Island) [31]               | -0.488 | 2.278 ( )   | 0.020 ( *)  | 1.257  | -3.378 ( *)    | 0.002 ( *)     | -2.143 ( )                       |
| Upland grassland (South Africa) [32]                 | -0.041 | -1.000 ( )  | 0.180 ( )   | 1.180  | 0.885 ( )      | 0.232 ( )      | 0.017 ( )                        |
| Maple-oak woodland (USA) [33]                        | -0.037 | 0.500 ( )   | 0.320 ( )   | 1.114  | -0.166 ( )     | 0.426 ( )      | 0.578 ( )                        |
| Snowy Mountains of Australia [34]                    | -0.139 | 0.778 ( )   | 0.236 ( )   | 1.165  | -1.432 ( )     | 0.076 ( )      | -0.804 ( )                       |
| Peat bog (Canada) [35]                               | 0.003  | -2.857 ( )  | 0.002 ( *)  | 0.905  | 1.722 ( )      | 0.035 ( *)     | -0.367 ( )                       |
| Arroyo Goye (Argentina) [36-38]                      | -0.034 | -0.091 ( )  | 0.497 ( )   | 0.114  | -0.125 ( )     | 0.446 ( )      | -0.507 ( )                       |
| Cerro Lopez (Argentina) [36-38]                      | -0.030 | 0.071 ( )   | 0.412 ( )   | 0.133  | -0.250 ( )     | 0.352 ( )      | -0.078 ( )                       |
| Llao Llao (Argentina) [36-38]                        | -0.059 | 0.182 ( )   | 0.375 ( )   | 0.124  | -0.375 ( )     | 0.317 ( )      | -0.504 ( )                       |
| Mascardi (c) (Argentina) [36-38]                     | -0.034 | 0.500 ( )   | 0.307 ( )   | 0.083  | 0.000 ( )      | 0.417 ( )      | 1.300 ( )                        |
| Mascardi (nc) (Argentina) [36-38]                    | -0.023 | -1.400 ( )  | 0.045 ( *)  | 0.151  | 1.555 ( )      | 0.040 ( *)     | 0.937 ( )                        |
| Quetrlhue (c) (Argentina) [36-38]                    | -0.051 | 0.900 ( )   | 0.144 ( )   | 0.104  | -1.428 ( )     | 0.081 ( )      | -0.806 ( )                       |
| Quetrlhue (nc) (Argentina) [36-38]                   | -0.043 | 1.636 ( )   | 0.073 ( )   | 0.079  | -1.750 ( )     | 0.053 ( )      | -0.627 ( )                       |
| Safariland (Argentina) [36-38]                       | -0.035 | 0.031 ( )   | 0.432 ( )   | 0.097  | -0.142 ( )     | 0.406 ( )      | -0.182 ( )                       |
| Plant - Hervibore (4)                                |        |             |             |        |                |                |                                  |

|                                             |        |           |           |       |           |           |           |
|---------------------------------------------|--------|-----------|-----------|-------|-----------|-----------|-----------|
| Arid grasslands in Marathon (USA) [39]      | -0.168 | 4.571 (*) | 0.000 (*) | 1.193 | -1.256 () | 0.112 ()  | 2.696 ()  |
| Arid grasslands in Altuda (USA) [39]        | -0.215 | 3.200 (*) | 0.001 (*) | 1.316 | -1.489 () | 0.048 (*) | 1.226 ()  |
| Whole country (Britain) [40]                | -0.016 | -0.500 () | 0.198 ()  | 1.100 | 0.875 ()  | 0.177 ()  | 0.693 ()  |
| Whole country (Finland) [40]                | -0.055 | 0.651 ()  | 0.275 ()  | 1.420 | 0.000 ()  | 0.240 ()  | -0.320 () |
| Plant - Seed Dispenser (5)                  |        |           |           |       |           |           |           |
| Forest (Papa New Guinea) [41]               | -0.030 | 0.075 ()  | 0.427 ()  | 1.131 | -0.588 () | 0.246 ()  | -0.537 () |
| Semideciduous tropical forest (Panama) [42] | -0.689 | 0.276 ()  | 0.322 ()  | 1.081 | -0.14 ()  | 0.449 ()  | -0.950 () |
| Neotropical forest (Trinidad) [43]          | -0.026 | 0.858 ()  | 0.192 ()  | 1.077 | -0.736 () | 0.231 ()  | -0.178 () |
| Birds and Berries. Calton (England) [43]    | -0.087 | 0.500 ()  | 0.346 ()  | 0.796 | 0.333 ()  | 0.358 ()  | 0.965 ()  |
| Temperate woodland (Britain) [44]           | -0.459 | 0.814 ()  | 0.266 ()  | 0.926 | -0.561 () | 0.470 ()  | 1.559 ()  |
| Anemone-Fish (1)                            |        |           |           |       |           |           |           |
| Coral reefs [45]                            | -0.064 | 0.063 ()  | 0.483 ()  | 1.085 | -0.633 () | 0.322 ()  | -1.025 () |

**Table S 2.** Pearson's correlation and nestedness  $\eta$  for empirical bimodal networks from different backgrounds appearing in Fig.4 . The z-score and P-values are calculated with respect to the random null model, and the "z-score with correlations" with the null model restricted to the actual correlation coefficient  $r$  of the network. As above, the asterisks \* stand for z-values larger than 3 (in absolute value) and P-values smaller than the threshold 0.05.

## References

1. Harriger L, van den Heuvel MP, Sporns O (2012) Rich club organization of macaque cerebral cortex and its role in network communication. *Plos One* 7: e46497.
2. Duch J, Arenas A (2005) Community identification using extremal optimization. *Physical Review E* 72: 027104.
3. Watts DJ, Strogatz SH (1998) Collective dynamics of 'small-world' networks. *Nature* 393: 440-442.
4. Jeong H, Mason S, Barabási A, Oltvai ZN (2001) Centrality and lethality of protein networks. *Nature* 411: 41.
5. McAuley J, Leskovec J (2012) Learning to discover social circles in ego networks. In: *Advances in Neural Information Processing Systems*. pp. 548–556.
6. Zachary WW (1977) An information flow model for conflict and fission in small groups. *Journal of Anthropological Research* 33: 452-473.
7. Kaitiaki trust network. available at <http://www.trustlet.org/datasets/kaitiaki/> Accessed 2013 Jul 31 .
8. Adamic LA, Glance N (2005) The political blogosphere and the 2004 us election. *Proceedings of the WWW-2005 Workshop on the Weblogging Ecosystem* .
9. Norlen K, Lucas G, Gebbie M, Chuang J (2002) Eva: Extraction, visualization and analysis of the telecommunications and media ownership network. *Proceedings of International Telecommunications Society 14th Biennial Conference, Seoul Korea* .
10. Cross R, Parker A (2004) *The Hidden Power of Social Networks*. Boston: Harvard Business School Press.
11. Lusseau D, Schneider K, Boisseau OJ, Haase P, Slooten E, et al. (2003) The bottlenose dolphin community of doubtful sound features a large proportion of long-lasting associations. *Behavioral Ecology and Sociobiology* 54: 396-405.
12. P Gleiser, Danon L (2003) Community structure in jazz. *Adv Complex Syst* 6: 565.
13. Girvan M, Newman MEJ (2002) Community structure in social and biological networks. *Proc Natl Acad Sci USA* 99: 7821-1826.
14. Newman MEJ (2006) Finding community structure in networks using the eigenvectors of matrices. *Phys Rev E* 74: 036104.
15. Opsahl T (2011) Why anchorage is not (that) important: Binary ties and sample selection. Available at <http://wpme/poFcY-Vw> Accessed 2013 Aug 10 .
16. Watts DJ, Strogatz SH (1998) Collective dynamics of 'small-world' networks. *Nature* 393: 440-442.

17. Opsahl T, Agneessens F, Skvoretz J (2010) Node centrality in weighted networks: Generalizing degree and shortest paths. *Social Networks* 3: 245–251.
18. Arroyo MTK, Primack RB, , Armesto JJ (1982) Community studies in pollination ecology in the high temperate andes of central chile. i. pollination mechanisms and altitudinal variation. *American Journal of Botany* 69: 82-97.
19. Clements RE, Long FL (1923) *Experimental pollination. An outline of the ecology of flowers and insects.* Washington D.C., USA: Carnegie Institute of Washington.
20. Dupont Y, Hansen D, Olesen J (2003) Structure of a plant-flower-visitor network in the high-altitude sub-alpine desert of tenerife, canary islands. *Ecography* 26: 301-310.
21. Hocking B (1968) Insect-flower associations in the high arctic with special reference to nectar. *Oikos* 19: 359-388.
22. McCullen CK (1993) Flower-visiting insects of the galapagos islands. *Pan-Pacific Entomologist* 69: 95-106.
23. Medan D, Montaldo NH, Devoto M, Mantese A, Vasellati V, et al. (2002) Plant-pollinator relationships at two altitudes in the andes of mendoza, argentina. *Arctic Antarctic and Alpine Research* 34: 233-24.
24. Ramirez N, Brito Y (1992) Pollination biology in a palm swamp community in the venezuelan central plains. *Botanical Journal of the Linnean Society* 110: 277-302.
25. Barrett SCH, Helenurm K (1987) The reproductive-biology of boreal forest herbs.1. breeding systems and pollination. *Canadian Journal of Botany* 65: 2036-2046.
26. Elberling H, Olesen JM (1999) The structure of a high latitude plant-flower visitor system: the dominance of flies. *Ecography* 22: 314-323.
27. Kevan PG (1970) High arctic insect-flower visitor relations: the inter-relationships of arthropods and flowers at Lake Hazen, Ellesmere Island, Northwest Territories, Canada. Ph.D. thesis thesis, University of Alberta.
28. Memmott J (1999) The structure of a plant-pollinator food web. *Ecology Letters* 2: 276-280.
29. Mosquin T, Martin JEH (1967) Observations on the pollination biology of plants on melville island, n.w.t., canada. *Canadian Field Naturalist* 81: 201-205.
30. Motten AF (1982) *Pollination Ecology of the Spring Wildflower Community in the Deciduous Forests of Piedmont North Carolina.* North Carolina, USA: Doctoral Dissertation thesis, Duke University, Duhram.
31. Olesen JM, Eskildsen LI, Venkatasamy S (2002) Invasion of pollination networks on oceanic islands: importance of invader complexes and endemic super generalists. *Diversity and Distributions* 8: 181-192.

32. Ollerton J, Johnson SD, Cranmer L, Kellie S (2003) The pollination ecology of an assemblage of grassland asclepiads in south africa. *Annals of Botany* 92: 807-834.
33. Schemske DW, Willson MF, Melampy MN, Miller LJ, Verner L, et al. (1978) Flowering ecology of some spring woodland herbs. *Ecology* 59: 351-366.
34. Inouye DW, Pyke GH (1988) Pollination biology in the snowy mountains of australia: comparisons with montane colorado, usa. *Australian Journal of Ecology* 13.
35. Small E (1976) Insect pollinators of the mer bleue peat bog of ottawa. *Canadian Field Naturalist* 90: 22-28.
36. Vázquez DP (2002) Interactions among Introduced Ungulates, Plants, and Pollinators: A Field Study in the Temperate Forest of the Southern Andes. Doctoral Dissertation thesis. Knoxville, Tennessee, USA: University of Tennessee, USA.
37. Vázquez DP, Simberloff D (2002) Ecological specialization and susceptibility to disturbance: conjectures and refutations. *American Naturalist* 159: 606-623.
38. Vázquez DP, Simberloff D (2003) Changes in interaction biodiversity induced by an introduced ungulate. *Ecology Letters* 6: 1077-1083.
39. Joern A (1979) Feeding patterns in grasshoppers (orthoptera: Acrididae): factors influencing diet specialization. *Oecologia* 38: 325-347.
40. Leather S (1991) Feeding specialisation and host distribution of british and finnish prunus feeding macrolepidoptera. *OIKOS* 60: 40-48.
41. Beehler B (1983) Frugivory and polygamy in birds of paradise. *The Auk* 100: 1-12.
42. Poulin B, Wright SJ, Lefebvre G, Calderon O (1999) Interspecific synchrony and asynchrony in the fruiting phenologies of congeneric bird-dispersed plants in panama. *Journal of Tropical Ecology* 15: 213-227.
43. Snow BK, Snow DW (1971) The feeding ecology of tanagers and honeycreepers in trinidad. *The Auk* 88: 291-322.
44. Sorensen A (1981) Interactions between birds and fruit in a temperate woodland. *Oecologia* 50: 242-249.
45. Ollerton J, McCollin D, Fautin D, Allen G (2006) Finding nemo: nestedness engendered by mutualistic organisation in anemonefish and their hosts. *Proceedings of the Royal Society B* : doi:10.1098.
